# Supplementary material for: Preventing shivering with adjuvant low dose intrathecal meperidine: A meta-analysis of randomized controlled trials with trial sequential analysis
Source: PubMed Central journal article supplement (PMC5681692; doi:10.1038/s41598-017-14917-5), 2017-11-10
Supplement: 41598_2017_14917_MOESM1_ESM.pdf [file 41598_2017_14917_MOESM1_ESM.pdf]

# Preventing shivering with adjuvant low dose intrathecal meperidine: A meta-analysis of randomized controlled trials with trial sequential analysis.

Yu-Cih Lin, RNA<sup>1,2</sup>; Chien-Yu Chen, MD, PhD<sup>1,3,4</sup>; Yuan-Mei Liao, RN, PhD<sup>2,5</sup>; Alan Hsi-Wen Liao, MBChB<sup>1</sup>; Pi-Chu Lin, RN, EdD<sup>2,6</sup>; Chuen-Chau Chang, MD, PhD<sup>1,2,3,\*</sup>

<sup>1</sup>Department of Anaesthesiology, Taipei Medical University Hospital, Taipei, 110, Taiwan

<sup>2</sup>School of Nursing, College of Nursing, Taipei Medical University, Taipei, 110, Taiwan

<sup>3</sup>Department of Anaesthesiology, School of Medicine, College of Medicine, Taipei Medical University, Taipei, 110, Taiwan

<sup>4</sup>Graduate Institute of Humanities in Medicine, Taipei Medical University, Taipei, 110, Taiwan

<sup>5</sup>Institute of Clinical Nursing, School of Nursing, National Yang-Ming University, Taipei City, 112, Taiwan

<sup>6</sup>Master Program in Long-Term Care, College of Nursing, Taipei Medical University, Taipei, 110, Taiwan

Corresponding author:

Chuen-Chau Chang,

Taipei Medical University Hospital

252 Wuxing St., Taipei 11031, Taiwan

Tel.: 886-2-2737-2181, ext. 8310

Fax: 886-2-2736-7344

E-mail: nekota@tmu.edu.tw (Chuen-Chau Chang)

Short title: Preventing shivering with adjuvant intrathecal meperidine

Word count for abstract: 208

Word count for text: 3815 (including Methods)

**Supplementary Table 1. Risk of bias of selection randomized controlled trials.**

| Study (year)                                    | Random sequence generation (selection bias) | Allocation concealment (selection bias) | Blinding of participants and personnel (performance bias) | Blinding of outcome assessment (detection bias) | Incomplete outcome data (attrition bias) | Selective reporting (reporting bias) | Other bias        |
|-------------------------------------------------|---------------------------------------------|-----------------------------------------|-----------------------------------------------------------|-------------------------------------------------|------------------------------------------|--------------------------------------|-------------------|
| Anaraki and Mirzaei (2012) <sup>25</sup>        | L                                           | U                                       | L                                                         | L                                               | L                                        | L                                    | L                 |
| Anaraki, <i>et al.</i> (2012) <sup>47</sup>     | L                                           | L                                       | L                                                         | L                                               | L                                        | L                                    | H <sup>a</sup>    |
| Chen, <i>et al.</i> (1993) <sup>49</sup>        | U                                           | U                                       | L                                                         | U                                               | L                                        | L                                    | H <sup>b</sup>    |
| Choi, <i>et al.</i> (2000) <sup>53</sup>        | U                                           | U                                       | L                                                         | U                                               | L                                        | L                                    | L                 |
| Chun, <i>et al.</i> (2010) <sup>44</sup>        | L                                           | U                                       | L                                                         | U                                               | L                                        | L                                    | L                 |
| Chung, <i>et al.</i> (1997) <sup>52</sup>       | L                                           | L                                       | L                                                         | U                                               | L                                        | L                                    | L                 |
| Davoudi, <i>et al.</i> (2007) <sup>55</sup>     | L                                           | U                                       | L                                                         | U                                               | L                                        | L                                    | L                 |
| Farzi, <i>et al.</i> (2014) <sup>58</sup>       | U                                           | U                                       | L                                                         | L                                               | L                                        | L                                    | L                 |
| Fidan, <i>et al.</i> (2008) <sup>45</sup>       | U                                           | U                                       | L                                                         | L                                               | H                                        | L                                    | L                 |
| Fu and Chang (2008) <sup>43</sup>               | L                                           | U                                       | L                                                         | U                                               | L                                        | L                                    | H <sup>d, g</sup> |
| Han, <i>et al.</i> (2007) <sup>56</sup>         | U                                           | U                                       | L                                                         | L                                               | L                                        | L                                    | L                 |
| Honarmand, <i>et al.</i> (2015) <sup>26</sup>   | L                                           | L                                       | L                                                         | L                                               | L                                        | L                                    | H <sup>c</sup>    |
| Hong and Lee (2005) <sup>28</sup>               | L                                           | L                                       | L                                                         | L                                               | H                                        | L                                    | H <sup>d, g</sup> |
| Imarengiaye, <i>et al.</i> (2011) <sup>31</sup> | L                                           | L                                       | L                                                         | L                                               | L                                        | L                                    | H <sup>c</sup>    |
| Khan, <i>et al.</i> (2011) <sup>27</sup>        | L                                           | U                                       | L                                                         | L                                               | L                                        | L                                    | L                 |
| Köroğlu, <i>et al.</i> (2003) <sup>50</sup>     | U                                           | U                                       | U                                                         | U                                               | L                                        | L                                    | L                 |
| Murto, <i>et al.</i> (1999) <sup>16</sup>       | L                                           | U                                       | L                                                         | L                                               | L                                        | L                                    | L                 |
| Nag and Gode (1984) <sup>54</sup>               | U                                           | U                                       | U                                                         | U                                               | L                                        | L                                    | L                 |
| Rastegarian, <i>et al.</i> (2013) <sup>29</sup> | H                                           | L                                       | L                                                         | L                                               | L                                        | L                                    | L                 |
| Roy, <i>et al.</i> (2004) <sup>57</sup>         | L                                           | L                                       | L                                                         | L                                               | L                                        | L                                    | L                 |
| Safavi, <i>et al.</i> (2014) <sup>30</sup>      | L                                           | L                                       | U                                                         | L                                               | L                                        | L                                    | L                 |
| Safavi, <i>et al.</i> (2014) <sup>46</sup>      | L                                           | U                                       | L                                                         | L                                               | L                                        | L                                    | U <sup>f</sup>    |
| Shami, <i>et al.</i> (2016) <sup>59</sup>       | L                                           | L                                       | L                                                         | U                                               | L                                        | L                                    | H <sup>a</sup>    |
| Tzeng, <i>et al.</i> (1987) <sup>33</sup>       | U                                           | U                                       | U                                                         | U                                               | L                                        | L                                    | L                 |
| Wang, <i>et al.</i> (2013) <sup>42</sup>        | L                                           | U                                       | L                                                         | U                                               | L                                        | L                                    | U <sup>d, g</sup> |
| Yi, <i>et al.</i> (2005) <sup>51</sup>          | U                                           | U                                       | U                                                         | U                                               | L                                        | L                                    | L                 |
| Yu, <i>et al.</i> (2002) <sup>32</sup>          | L                                           | L                                       | L                                                         | U                                               | L                                        | L                                    | L                 |
| Zabetian, <i>et al.</i> (2013) <sup>48</sup>    | L                                           | L                                       | L                                                         | L                                               | L                                        | L                                    | L                 |

H, high risk; L, low risk; U, unclear risk; <sup>a</sup> Data error noted in manuscript; <sup>b</sup> Different shivering assessment scale; <sup>c</sup> Data errors noted on table 1; <sup>d</sup> Spinal and epidural anaesthesia combined; <sup>e</sup> Only post-operation shivering assessed; <sup>f</sup> No indication of what kind of shivering assessment scale adopted; <sup>g</sup> Spinal needle size unclear

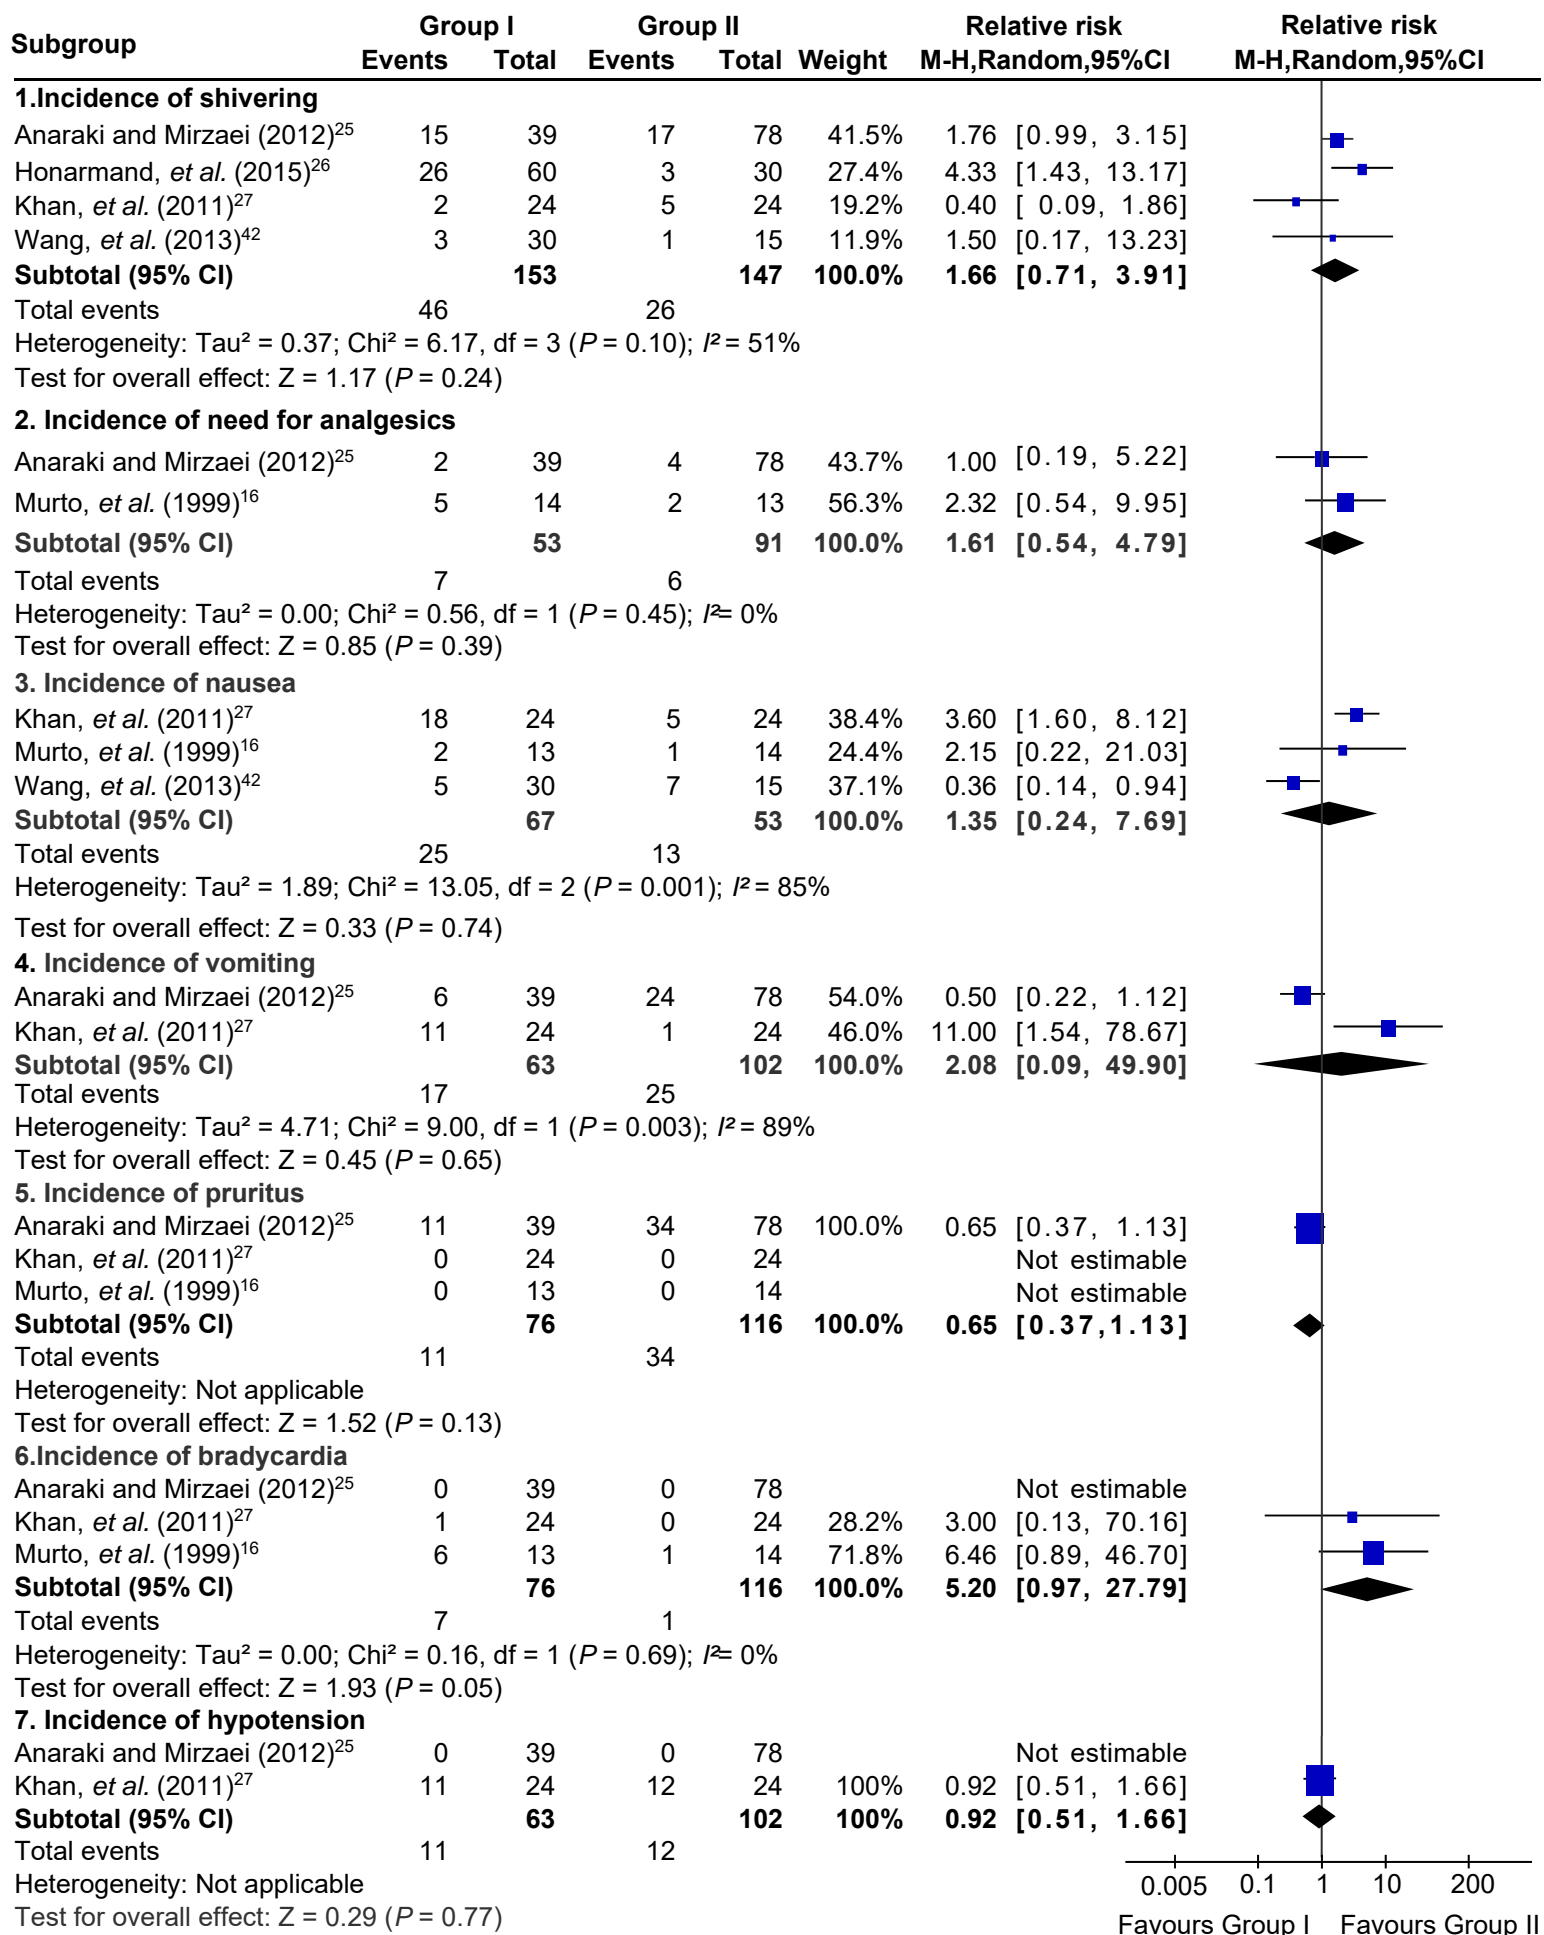

**Supplementary Figure 1.** Comparing dose equal to or less than 0.2 mg kg<sup>-1</sup> or 12.5 mg (Group I) and dose more than 0.2 mg kg<sup>-1</sup> or 12.5 mg (Group II) of adjuvant intrathecal meperidine in incidence of shivering and secondary outcomes.

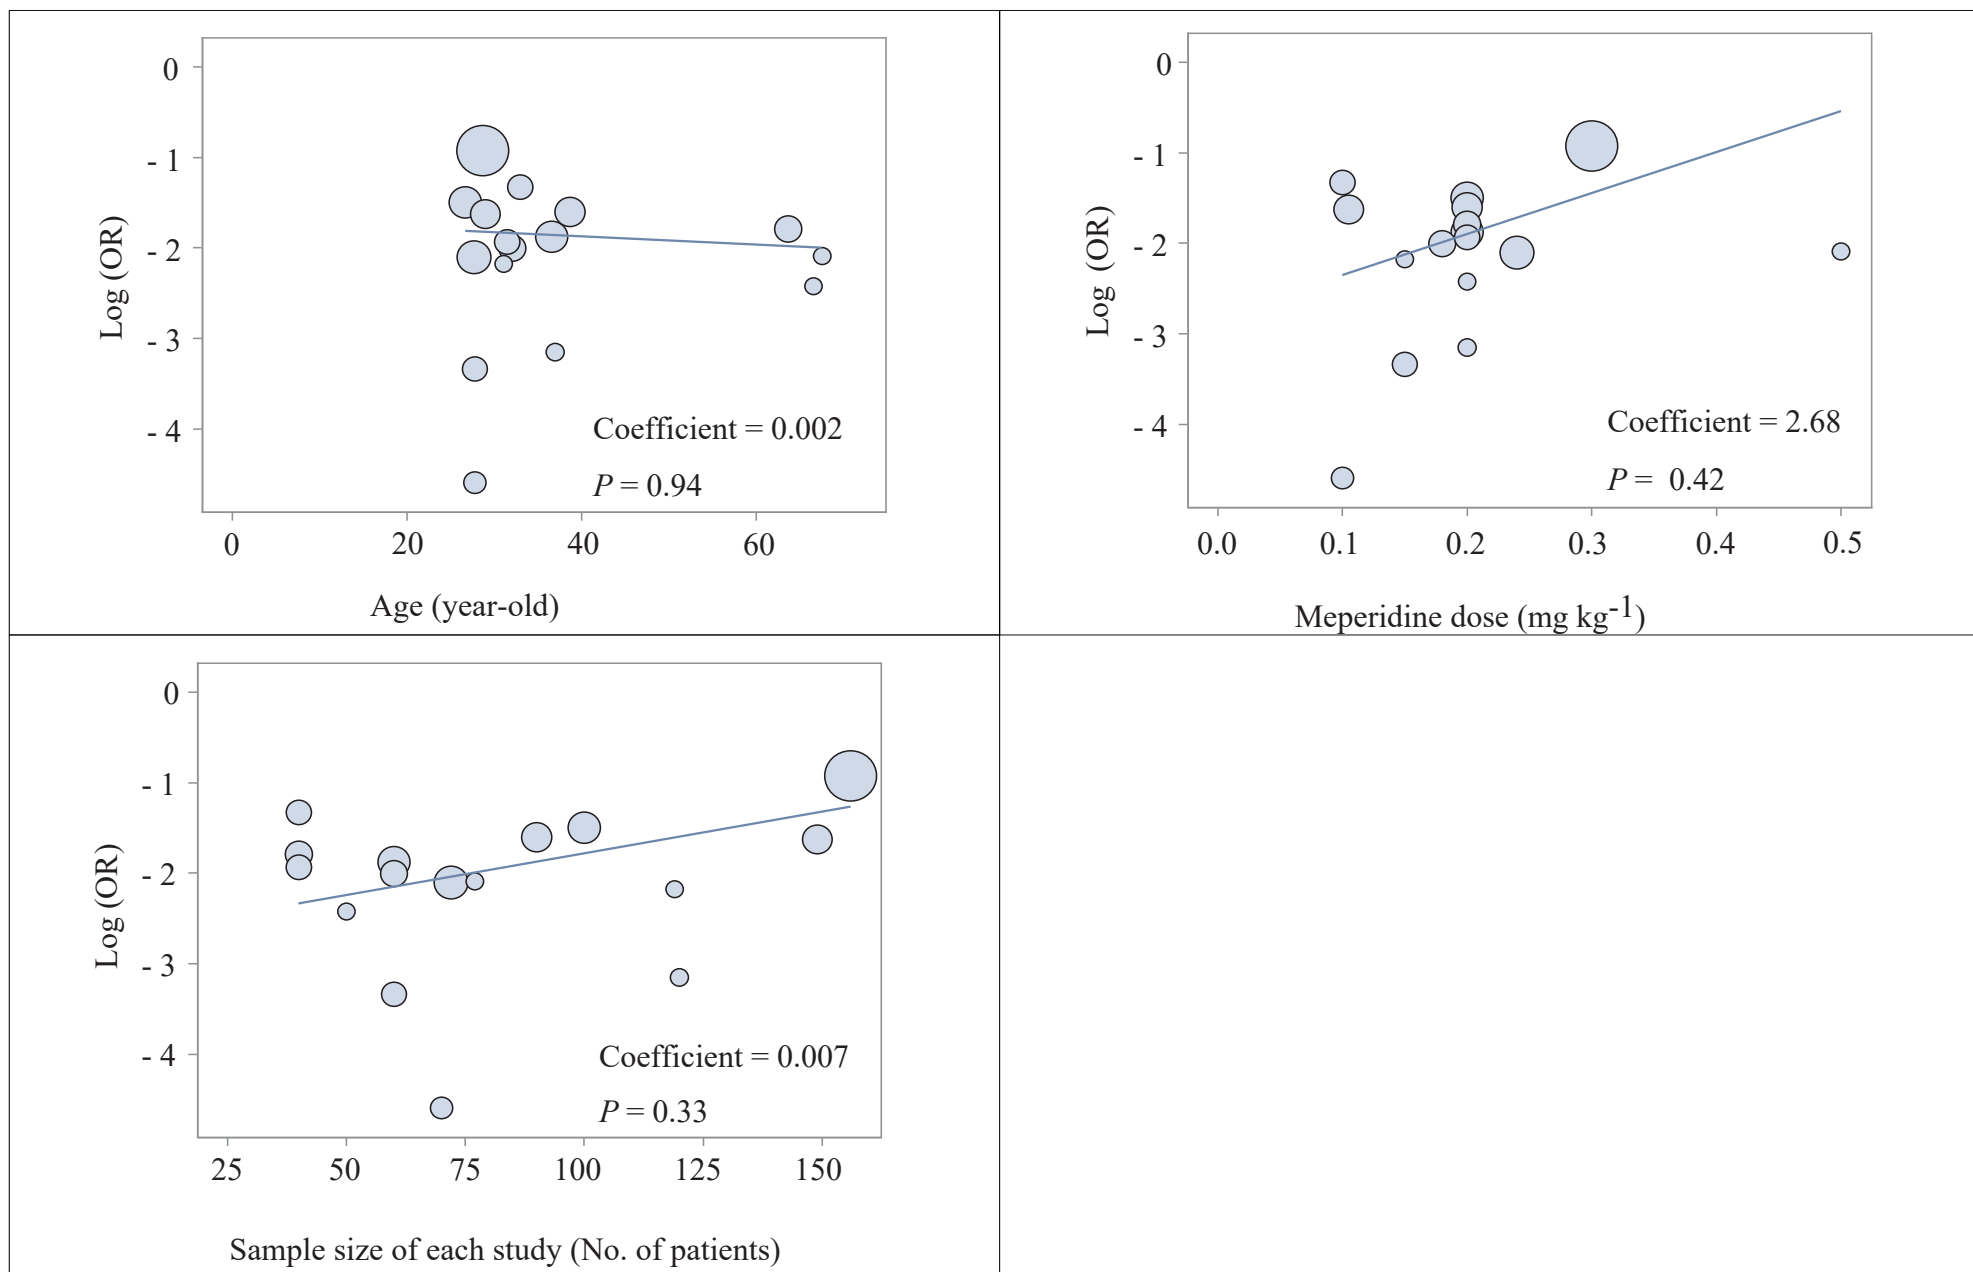

**Supplementary Figure 2.** Meta-regression of shivering for covariates of age, meperidine dose, and sample size of each study.
